# Supplementary material for: A simulation-based breeding design that uses whole-genome prediction in tomato
Source: PubMed Central journal article supplement (PMC4726135; doi:10.1038/srep19454), 2016-01-20
Supplement: srep19454-s1.pdf [file srep19454-s1.pdf]

## Supplementary Information

### A simulation-based breeding design that uses whole-genome prediction in tomato

Eiji Yamamoto<sup>1</sup>, Hiroshi Matsunaga<sup>1</sup>, Akio Onogi<sup>2</sup>, Hiromi Kajiya-Kanegae<sup>2</sup>, Mai Minamikawa<sup>2</sup>, Akinori Suzuki<sup>2</sup>, Kenta Shirasawa<sup>3</sup>, Hideki Hirakawa<sup>3</sup>, Tsukasa Nunome<sup>1</sup>, Hirotaka Yamaguchi<sup>1</sup>, Koji Miyatake<sup>1</sup>, Akio Ohyama<sup>4</sup>, Hiroyoshi Iwata<sup>2</sup> & Hiroyuki Fukuoka<sup>1</sup>

<sup>1</sup>NARO Institute of Vegetable and Tea Science (NIVTS), 360 Kusawa, Ano, Tsu, Mie 514-2392, Japan. <sup>2</sup>Department of Agricultural and Environmental Biology, Graduate School of Agricultural and Life Sciences, The University of Tokyo, 1-1-1 Yayoi, Bunkyo-Ku, Tokyo 113-8657, Japan. <sup>3</sup>Kazusa DNA Research Institute, 2-6-7 Kazusa-kamatari, Kisarazu, Chiba 292-0818, Japan. <sup>4</sup>NARO Institute of Vegetable and Tea Science (NIVTS), 3-1-1 Kannondai, Tsukuba, Ibaraki 305-8666, Japan. Correspondence and requests for materials should be addressed to E.Y. (email: yame@affrc.go.jp)

Supplementary Tables S1–S3

Supplementary Figures S1–S3

Supplementary Methods

Supplementary Note

References

**Supplementary Table S1** List of tomato varieties used in the present study

| Variety | Year of development | Hierarchical clustering | Bayesian clustering |           |
|---------|---------------------|-------------------------|---------------------|-----------|
|         |                     |                         | <i>K1</i>           | <i>K2</i> |
| SL1     | 2009                | 2                       | 0.82                | 0.18      |
| SL2     | 1985                | 1                       | 0.34                | 0.66      |
| SL3     | 1998                | 2                       | 0.82                | 0.18      |
| SL4     | 1975                | 4                       | 0.00                | 1.00      |
| SL5     | 1985                | 1                       | 0.17                | 0.83      |
| SL6     | 2005                | 3                       | 0.83                | 0.17      |
| SL7     | NA                  | 1                       | 0.42                | 0.58      |
| SL8     | 1971                | 4                       | 0.00                | 1.00      |
| SL9     | 2000                | 3                       | 0.86                | 0.14      |
| SL10    | 1955                | 4                       | 0.00                | 1.00      |
| SL11    | 1983                | 1                       | 0.10                | 0.90      |
| SL12    | 1990                | 3                       | 1.00                | 0.00      |
| SL13    | NA                  | 3                       | 1.00                | 0.00      |
| SL14    | 1991                | 3                       | 0.97                | 0.03      |
| SL15    | 1976                | 4                       | 0.00                | 1.00      |
| SL16    | 2003                | 3                       | 1.00                | 0.00      |
| SL17    | 1976                | 4                       | 0.00                | 1.00      |
| SL18    | 2000                | 3                       | 1.00                | 0.00      |
| SL20    | 1976                | 4                       | 0.00                | 1.00      |
| SL21    | 1952                | 4                       | 0.00                | 1.00      |
| SL22    | 1991                | 2                       | 0.75                | 0.25      |
| SL23    | 1996                | 3                       | 1.00                | 0.00      |
| SL24    | 1987                | 3                       | 0.89                | 0.11      |
| SL25    | 1979                | 4                       | 0.09                | 0.91      |
| SL26    | 2005                | 2                       | 0.82                | 0.18      |
| SL27    | 1994                | 1                       | 0.72                | 0.28      |
| SL28    | 1980                | 1                       | 0.52                | 0.48      |
| SL29    | 1979                | 4                       | 0.07                | 0.93      |
| SL30    | 2008                | 3                       | 1.00                | 0.00      |
| SL31    | NA                  | 1                       | 0.43                | 0.57      |
| SL32    | 2007                | 2                       | 0.64                | 0.36      |
| SL33    | 1967                | 4                       | 0.00                | 1.00      |
| SL34    | 2009                | 3                       | 1.00                | 0.00      |
| SL35    | 1977                | 4                       | 0.16                | 0.84      |
| SL36    | 1980                | 4                       | 0.13                | 0.87      |
| SL37    | 1973                | 4                       | 0.00                | 1.00      |
| SL38    | 1989                | 3                       | 0.93                | 0.07      |
| SL39    | 2001                | 3                       | 1.00                | 0.00      |
| SL40    | 1992                | 1                       | 0.35                | 0.66      |
| SL41    | 1996                | 3                       | 1.00                | 0.00      |
| SL42    | 1997                | 3                       | 1.00                | 0.00      |
| SL43    | 1985                | 1                       | 0.32                | 0.68      |
| SL44    | 1982                | 4                       | 0.00                | 1.00      |
| SL45    | 2002                | 2                       | 0.82                | 0.18      |
| SL46    | 1970                | 1                       | 0.51                | 0.49      |
| SL47    | NA                  | 1                       | 0.55                | 0.45      |
| SL48    | 1999                | 2                       | 0.72                | 0.28      |
| SL49    | 1989                | 1                       | 0.44                | 0.56      |
| SL50    | 1970                | 4                       | 0.00                | 1.00      |

**Supplementary Table S1** (*Continued*)

| Variety | Year of development | Hierarchical clustering | Bayesian clustering |           |
|---------|---------------------|-------------------------|---------------------|-----------|
|         |                     |                         | <i>K1</i>           | <i>K2</i> |
| SL51    | 1971                | 4                       | 0.01                | 0.99      |
| SL52    | 1998                | 2                       | 0.69                | 0.31      |
| SL53    | 1981                | 4                       | 0.11                | 0.89      |
| SL54    | 2009                | 3                       | 1.00                | 0.00      |
| SL55    | 1980                | 1                       | 0.58                | 0.42      |
| SL56    | 1976                | 1                       | 0.43                | 0.57      |
| SL57    | 1984                | 1                       | 0.38                | 0.62      |
| SL58    | NA                  | 4                       | 0.00                | 1.00      |
| SL59    | 2009                | 2                       | 0.85                | 0.16      |
| SL60    | NA                  | 1                       | 0.36                | 0.64      |
| SL61    | 2009                | 2                       | 0.85                | 0.15      |
| SL62    | 1952                | 4                       | 0.00                | 1.00      |
| SL63    | 1980                | 4                       | 0.06                | 0.94      |
| SL64    | 1984                | 4                       | 0.23                | 0.77      |
| SL65    | 1983                | 1                       | 0.41                | 0.59      |
| SL66    | NA                  | 3                       | 0.83                | 0.17      |
| SL67    | 1993                | 2                       | 0.79                | 0.21      |
| SL68    | 2008                | 3                       | 0.98                | 0.02      |
| SL69    | 1973                | 4                       | 0.02                | 0.98      |
| SL70    | 2000                | 4                       | 0.21                | 0.80      |
| SL71    | 1981                | 4                       | 0.09                | 0.91      |
| SL72    | NA                  | 3                       | 0.97                | 0.03      |
| SL73    | NA                  | 1                       | 0.50                | 0.50      |
| SL74    | 2009                | 3                       | 1.00                | 0.00      |
| SL75    | 2009                | 3                       | 1.00                | 0.00      |
| SL76    | 2004                | 3                       | 1.00                | 0.00      |
| SL77    | 1982                | 1                       | 0.36                | 0.64      |
| SL79    | 1982                | 3                       | 1.00                | 0.00      |
| SL80    | 1994                | 3                       | 1.00                | 0.00      |
| SL81    | 1974                | 1                       | 0.58                | 0.42      |
| SL82    | 1981                | 1                       | 0.42                | 0.58      |
| SL83    | 1986                | 1                       | 0.54                | 0.46      |
| SL84    | 2007                | 2                       | 0.74                | 0.26      |
| SL85    | 1994                | 3                       | 1.00                | 0.00      |
| SL86    | 1999                | 2                       | 0.60                | 0.40      |
| SL87    | 2009                | 2                       | 0.88                | 0.12      |
| SL88    | 2000                | 2                       | 0.64                | 0.36      |
| SL89    | 1981                | 4                       | 0.00                | 1.00      |
| SL90    | 2008                | 3                       | 0.97                | 0.03      |
| SL91    | 1986                | 1                       | 0.69                | 0.31      |
| SL92    | NA                  | 2                       | 0.60                | 0.40      |
| SL93    | 2009                | 2                       | 0.89                | 0.11      |
| SL94    | 1997                | 2                       | 0.75                | 0.25      |
| SL95    | 1985                | 1                       | 0.44                | 0.56      |
| SL96    | 1981                | 1                       | 0.30                | 0.70      |
| SL102   | NA                  | 1                       | 0.11                | 0.89      |
| SL103   | NA                  | 4                       | 0.00                | 1.00      |

**Supplementary Table S2** List of the significant associations detected by the genome-wide association study

| Trait | SNP ID       | Chr  | Position (bp) | Position (cM) | $r^2$ | MLM     |               | EBL      |        |      |          |            |          |
|-------|--------------|------|---------------|---------------|-------|---------|---------------|----------|--------|------|----------|------------|----------|
|       |              |      |               |               |       | Effect  | $-\log_{10}P$ | $\theta$ | Effect | SD   | $\tau^2$ | $\delta^2$ | $\eta^2$ |
| AFW   | AX-95768470  | 9    | 4894274       | 51.94         | 0.01  | -24.703 | 2.716         | 0.1      | -17.74 | 1.69 | 2.22     | 222.98     | 0.03     |
|       |              |      |               |               |       |         |               | 1        | -23.92 | 1.28 | 0.69     | 674.21     | 0.00     |
|       |              |      |               |               |       |         |               | 5        | -28.50 | 1.03 | 0.31     | 1357.09    | 0.00     |
| AFW   | AX-107553846 | 9    | 5015774       | 52.72         | 0.05  | -14.161 | 3.503         | 0.0001   | -9.23  | 2.18 | 17.95    | 2.46       | 21.86    |
|       |              |      |               |               |       |         |               | 0.001    | -9.67  | 2.11 | 15.12    | 15.83      | 2.86     |
| AMFW  | AX-107553846 | 9    | 5015774       | 52.72         | 0.07  | -14.925 | 4.410         | 0.0001   | -10.49 | 2.03 | 11.63    | 2.49       | 14.02    |
|       |              |      |               |               |       |         |               | 0.001    | -10.97 | 1.96 | 9.82     | 15.95      | 1.84     |
|       |              |      |               |               |       |         |               | 0.01     | -12.02 | 1.72 | 6.12     | 68.90      | 0.27     |
|       |              |      |               |               |       |         |               | 0.1      | -13.03 | 1.40 | 3.41     | 223.93     | 0.05     |
|       |              |      |               |               |       |         |               | 1        | -13.83 | 1.07 | 1.74     | 675.51     | 0.01     |
| 5     | -13.70       | 0.89 | 1.23          | 1359.07       | 0.00  |         |               |          |        |      |          |            |          |
| SSC   | AX-95816341  | 2    | 37533453      | 70.70         | 0.29  | 0.131   | 1.188         | 0.0001   | 0.15   | 0.03 | 9.77     | 2.26       | 12.95    |
|       |              |      |               |               |       |         |               | 0.001    | 0.17   | 0.03 | 7.51     | 14.61      | 1.54     |
| SSC   | AX-107530294 | 5    | 626924        | 3.83          | 0.29  | -0.085  | 0.467         | 0.0001   | -0.24  | 0.03 | 3.81     | 2.26       | 5.04     |
| SSC   | AX-95792472  | 9    | 2623609       | 34.38         | 0.07  | -0.271  | 5.579         | 0.0001   | -0.23  | 0.04 | 4.27     | 2.26       | 5.66     |
|       |              |      |               |               |       |         |               | 0.001    | -0.23  | 0.04 | 4.29     | 14.61      | 0.88     |
|       |              |      |               |               |       |         |               | 0.01     | -0.23  | 0.03 | 3.30     | 66.42      | 0.15     |
|       |              |      |               |               |       |         |               | 0.1      | -0.25  | 0.03 | 1.69     | 222.49     | 0.02     |
|       |              |      |               |               |       |         |               | 1        | -0.27  | 0.02 | 0.80     | 674.44     | 0.00     |
| 5     | -0.27        | 0.02 | 0.51          | 1357.11       | 0.00  |         |               |          |        |      |          |            |          |
| PCol  | AX-107528977 | 1    | 70228553      | 49.28         | 0.32  | -0.124  | 3.009         | 0.1      | -0.14  | 0.01 | 0.88     | 220.68     | 0.01     |
|       |              |      |               |               |       |         |               | 1        | -0.13  | 0.01 | 0.53     | 670.25     | 0.00     |
|       |              |      |               |               |       |         |               | 5        | -0.12  | 0.00 | 0.40     | 1352.94    | 0.00     |
| PCol  | AX-95802300  | 1    | 71269940      | 51.30         | 0.58  | -0.273  | 9.198         | 0.0001   | -0.33  | 0.01 | 0.32     | 2.52       | 0.38     |
|       |              |      |               |               |       |         |               | 0.001    | -0.33  | 0.01 | 0.30     | 15.87      | 0.06     |
|       |              |      |               |               |       |         |               | 0.01     | -0.32  | 0.01 | 0.23     | 68.32      | 0.01     |
| PCol  | AX-95782963  | 1    | 75814558      | 59.34         | 0.22  | 0.126   | 3.749         | 0.1      | 0.10   | 0.01 | 1.75     | 220.68     | 0.02     |
|       |              |      |               |               |       |         |               | 1        | 0.10   | 0.01 | 0.90     | 670.25     | 0.00     |
|       |              |      |               |               |       |         |               | 5        | 0.10   | 0.00 | 0.55     | 1352.94    | 0.00     |
| SS    | AX-107526519 | 9    | 1937367       | 29.36         | 0.22  | 0.279   | 3.491         | 0.0001   | 0.20   | 0.04 | 6.28     | 2.56       | 7.36     |
|       |              |      |               |               |       |         |               | 0.001    | 0.20   | 0.04 | 6.01     | 16.30      | 1.11     |
| PBF   | AX-107540607 | 4    | 62766820      | 133.53        | 0.32  | -3.493  | 5.800         | -        | -      | -    | -        | -          | -        |
| PIF   | AX-107529487 | 1    | 85767014      | 132.77        | 0.10  | 2.085   | 2.195         | 1        | 1.72   | 0.18 | 3.12     | 674.13     | 0.01     |
|       |              |      |               |               |       |         |               | 5        | 1.63   | 0.15 | 2.39     | 1355.61    | 0.01     |
| PIF   | AX-107526307 | 3    | 508999        | 9.97          | 0.14  | 3.443   | 4.285         | 0.0001   | 2.61   | 0.36 | 5.64     | 2.55       | 6.64     |
|       |              |      |               |               |       |         |               | 0.001    | 2.62   | 0.35 | 5.24     | 16.28      | 0.97     |
|       |              |      |               |               |       |         |               | 0.01     | 2.72   | 0.31 | 3.72     | 69.82      | 0.16     |
|       |              |      |               |               |       |         |               | 0.1      | 2.47   | 0.24 | 2.74     | 224.31     | 0.04     |
| 1     | 1.83         | 0.18 | 2.77          | 674.13        | 0.01  |         |               |          |        |      |          |            |          |
| PIF   | AX-107532554 | 4    | 1786073       | 23.46         | 0.17  | 3.468   | 3.616         | 0.1      | 1.93   | 0.24 | 4.53     | 224.31     | 0.06     |
|       |              |      |               |               |       |         |               | 1        | 2.06   | 0.18 | 2.19     | 674.13     | 0.01     |
| PIF   | AX-107544746 | 9    | 1874011       | 28.56         | 0.00  | 1.737   | 1.533         | 5        | 2.26   | 0.24 | 1.25     | 1355.61    | 0.00     |
| PCF   | AX-95814346  | 2    | 46569227      | 131.42        | 0.20  | -0.674  | 3.757         | 0.01     | -0.40  | 0.05 | 4.84     | 68.39      | 0.21     |
| PCF   | AX-95775213  | 3    | 8107799       | 51.09         | 0.15  | -0.549  | 3.021         | 0.1      | -0.31  | 0.05 | 5.03     | 222.17     | 0.07     |
|       |              |      |               |               |       |         |               | 1        | -0.41  | 0.03 | 1.52     | 672.13     | 0.01     |
|       |              |      |               |               |       |         |               | 5        | -0.45  | 0.03 | 0.81     | 1354.87    | 0.00     |
| PCF   | AX-107545745 | 4    | 4722129       | 45.06         | 0.00  | -0.458  | 2.900         | 1        | -0.20  | 0.04 | 5.76     | 672.13     | 0.03     |

Supplementary Table S2 (Continued)

| Trait | SNP ID       | Chr  | Position (bp) | Position (cM) | $r^2$ | MLM    |               | EBL      |        |      |          |            |          |
|-------|--------------|------|---------------|---------------|-------|--------|---------------|----------|--------|------|----------|------------|----------|
|       |              |      |               |               |       | Effect | $-\log_{10}P$ | $\theta$ | Effect | SD   | $\tau^2$ | $\delta^2$ | $\eta^2$ |
| PCF   | AX-95773156  | 5    | 63169277      | 119.67        | 0.14  | -0.604 | 4.205         | 0.0001   | -0.32  | 0.08 | 11.23    | 2.48       | 13.56    |
|       |              |      |               |               |       |        |               | 0.001    | -0.34  | 0.08 | 9.65     | 15.80      | 1.83     |
|       |              |      |               |               |       |        |               | 0.01     | -0.27  | 0.06 | 10.63    | 68.39      | 0.46     |
| PCF   | AX-95789137  | 5    | 63705710      | 124.20        | 0.00  | 0.506  | 2.671         | 1        | 0.33   | 0.04 | 2.28     | 672.13     | 0.01     |
|       |              |      |               |               |       |        |               | 5        | 0.46   | 0.03 | 0.77     | 1354.87    | 0.00     |
| PCF   | AX-105346901 | 7    | 58641570      | 42.46         | 0.02  | 0.544  | 3.092         | 0.1      | 0.32   | 0.05 | 4.64     | 222.17     | 0.06     |
| LL    | AX-95774169  | 2    | 30666575      | 18.40         | 0.07  | 2.475  | 3.836         | 0.0001   | 1.34   | 0.36 | 22.20    | 2.58       | 25.81    |
|       |              |      |               |               |       |        |               | 0.001    | 1.47   | 0.35 | 17.09    | 16.27      | 3.14     |
|       |              |      |               |               |       |        |               | 0.01     | 1.75   | 0.32 | 9.30     | 69.69      | 0.40     |
|       |              |      |               |               |       |        |               | 0.1      | 1.61   | 0.24 | 6.42     | 224.41     | 0.09     |
|       |              |      |               |               |       |        |               | 1        | 2.07   | 0.21 | 2.78     | 675.58     | 0.01     |
| 5     | 2.09         | 0.17 | 1.79          | 1357.70       | 0.00  |        |               |          |        |      |          |            |          |
| LL    | AX-107526715 | 2    | 46747730      | 132.16        | 0.19  | -3.723 | 3.326         | 0.1      | -2.15  | 0.29 | 3.61     | 224.41     | 0.05     |
| LL    | AX-107530056 | 3    | 49391068      | 59.87         | 0.24  | -3.514 | 3.198         | 0.1      | -2.07  | 0.26 | 3.88     | 224.41     | 0.05     |
| LW    | AX-107544905 | 1    | 80430590      | 100.56        | 0.09  | 3.277  | 2.512         | 1        | 2.28   | 0.18 | 1.57     | 674.51     | 0.01     |
|       |              |      |               |               |       |        |               | 5        | 2.78   | 0.15 | 0.72     | 1357.70    | 0.00     |
| LW    | AX-95774169  | 2    | 30666575      | 18.40         | 0.03  | 3.834  | 2.247         | 0.1      | 1.61   | 0.24 | 6.03     | 223.47     | 0.08     |
|       |              |      |               |               |       |        |               | 1        | 1.90   | 0.17 | 2.24     | 674.51     | 0.01     |
|       |              |      |               |               |       |        |               | 5        | 1.93   | 0.14 | 1.49     | 1357.70    | 0.00     |
| LW    | AX-107537130 | 2    | 31577517      | 22.85         | 0.08  | 3.020  | 2.324         | 1        | 1.79   | 0.18 | 2.52     | 674.51     | 0.01     |
|       |              |      |               |               |       |        |               | 5        | 1.54   | 0.15 | 2.31     | 1357.70    | 0.01     |
| SW    | AX-107544905 | 1    | 80430590      | 100.56        | 0.02  | 0.852  | 1.709         | 1        | 0.50   | 0.06 | 4.28     | 675.17     | 0.02     |
|       |              |      |               |               |       |        |               | 5        | 0.73   | 0.05 | 1.42     | 1357.81    | 0.00     |
| HIT   | AX-107541971 | 1    | 86566633      | 137.79        | 0.02  | -4.788 | 2.095         | 5        | -2.84  | 0.27 | 2.23     | 1356.42    | 0.00     |
| NFlo  | AX-107552308 | 2    | 48487492      | 151.84        | 0.07  | 1.719  | 3.333         | 0.1      | 1.07   | 0.10 | 2.45     | 224.15     | 0.03     |
| DTF   | AX-107529487 | 1    | 85767014      | 132.77        | 0.12  | 0.570  | 1.313         | 1        | 0.35   | 0.07 | 12.45    | 674.89     | 0.05     |
| DTF   | AX-107530056 | 3    | 49391068      | 59.87         | 0.29  | 0.926  | 1.851         | 1        | 1.16   | 0.08 | 1.23     | 674.89     | 0.01     |
|       |              |      |               |               |       |        |               | 5        | 0.80   | 0.07 | 1.93     | 1357.28    | 0.00     |
| DTF   | AX-105347391 | 6    | 36178958      | 45.78         | 0.00  | 0.651  | 1.735         | 1        | 0.47   | 0.10 | 7.11     | 674.89     | 0.03     |
| NL1T  | AX-107528273 | 3    | 50678874      | 59.87         | 0.00  | 0.461  | 2.343         | 1        | 0.45   | 0.04 | 1.39     | 675.13     | 0.01     |
|       |              |      |               |               |       |        |               | 5        | 0.59   | 0.03 | 0.54     | 1357.45    | 0.00     |
| NL1T  | AX-95814127  | 5    | 2899948       | 37.22         | 0.14  | 0.345  | 2.220         | 0.0001   | 0.23   | 0.07 | 17.89    | 2.61       | 20.55    |

PF, percentage of fruit set; TFW, total fruit weight; AFW, average fruit weight; PMF, percentage of marketable fruits; TMFW, total marketable fruit weight; AMFW, average marketable fruit weight; SSC, soluble solids content; PCol, pericarp color; SS, style scar; PBF, percentage of blossom-end rot fruits; PIF, percentage of irregular shaped fruits; PCF, percentage of cracked fruits; PSF, percentage of small fruits; LL, leaf length; LW, leaf width; SW, stem width; HIT, height to the first truss; NFlo, number of flowers; DTF, days to flowering; NL1T, number of leaves under the first truss. See Table 1 for the details.

**Supplementary Table S3** Summary of the design of a single-nucleotide polymorphism (SNP) genotyping array

| SL2.40ch | Number of candidate SNPs | Q > 30    | Number of polymorphic reads > 2 | Number of reads on the SNP site < 500 | Number of SNPs provided for 50K SNP array | Number of SNPs provided for the genetic analysis |
|----------|--------------------------|-----------|---------------------------------|---------------------------------------|-------------------------------------------|--------------------------------------------------|
| 1        | 1,350,865                | 1,020,741 | 430,057                         | 401,966                               | 5,929                                     | 1,801                                            |
| 2        | 990,576                  | 766,610   | 333,923                         | 318,994                               | 5,062                                     | 1,452                                            |
| 3        | 940,293                  | 703,851   | 283,441                         | 260,973                               | 4,477                                     | 1,220                                            |
| 4        | 949,622                  | 729,925   | 323,682                         | 307,347                               | 5,333                                     | 1,821                                            |
| 5        | 827,602                  | 631,362   | 276,057                         | 257,613                               | 4,010                                     | 774                                              |
| 6        | 1,015,221                | 832,195   | 461,013                         | 444,392                               | 4,087                                     | 866                                              |
| 7        | 843,100                  | 643,182   | 276,804                         | 256,564                               | 3,093                                     | 984                                              |
| 8        | 801,849                  | 607,382   | 258,392                         | 239,352                               | 3,582                                     | 1,097                                            |
| 9        | 1,364,857                | 1,171,846 | 758,392                         | 734,549                               | 4,023                                     | 1,474                                            |
| 10       | 863,897                  | 669,628   | 307,091                         | 284,550                               | 3,681                                     | 1,690                                            |
| 11       | 830,820                  | 652,913   | 323,610                         | 306,922                               | 4,612                                     | 2,273                                            |
| 12       | 891,116                  | 703,253   | 345,836                         | 322,588                               | 4,023                                     | 1,330                                            |
| Total    | 11,669,818               | 9,132,888 | 4,378,298                       | 4,135,810                             | 51,912                                    | 16,782                                           |

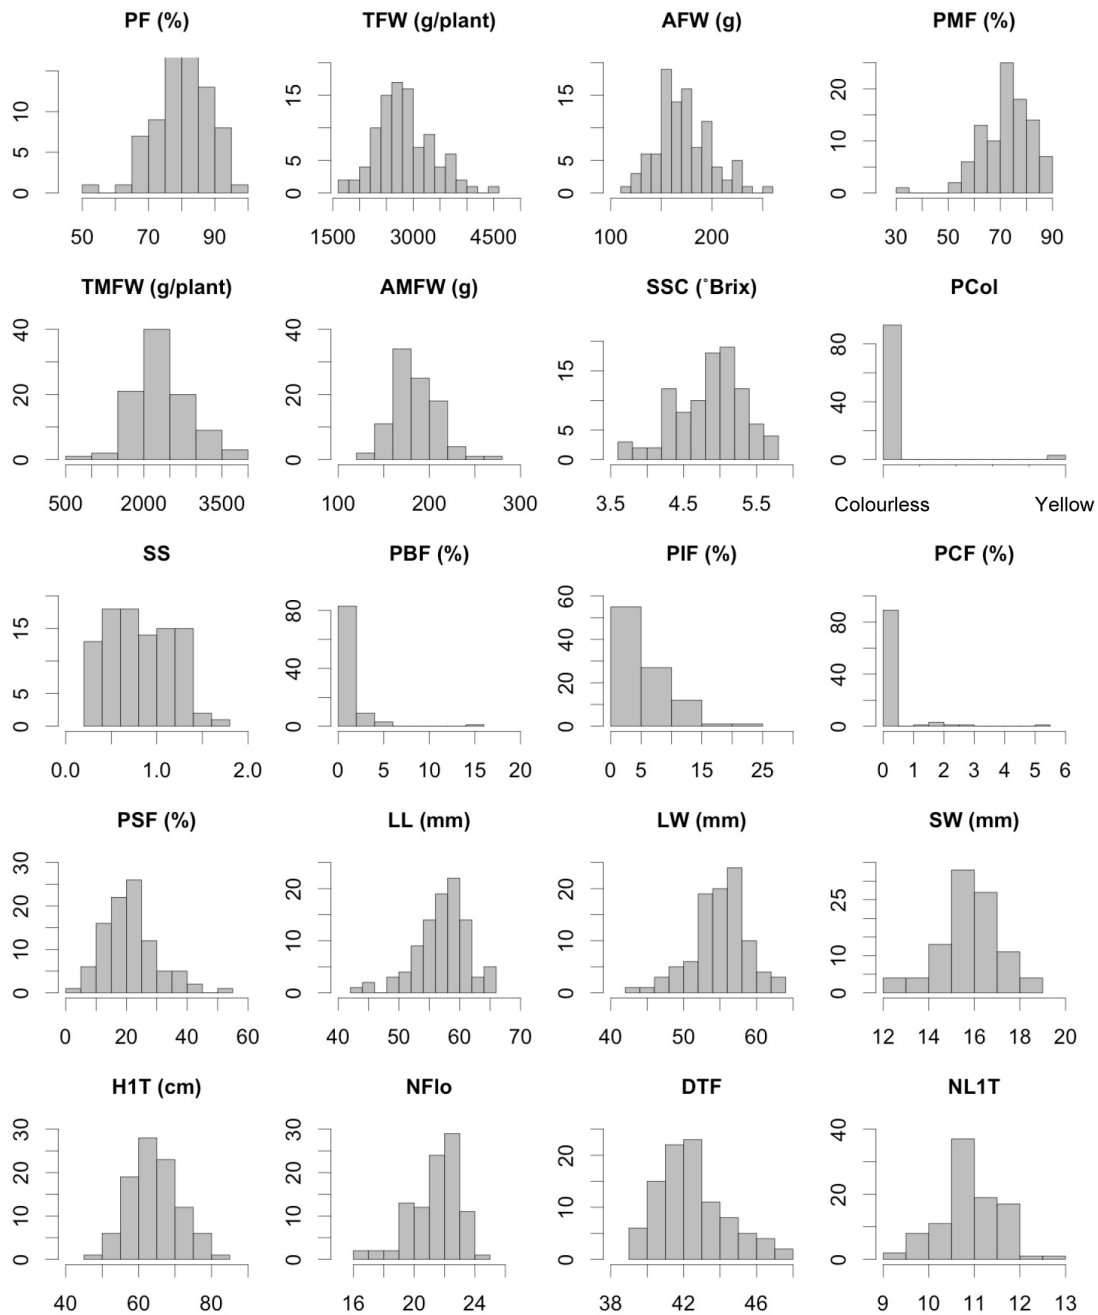

**Supplementary Figure S1** Phenotypic distributions of the 96 tomato varieties used in the present study. PF, percentage of fruit set; TFW, total fruit weight; AFW, average fruit weight; PMF, percentage of marketable fruits; TMFW, total marketable fruit weight; AMFW, average marketable fruit weight; SSC, soluble solids content; PCol, pericarp colour; SS, style scar; PBF, percentage of blossom-end rot fruits; PIF, percentage of irregular-shaped fruits; PCF, percentage of cracked fruits; PSF, percentage of small fruits; LL, leaf length; LW, leaf width; SW, stem width; H1T, height to the first truss; NFlo, number of flowers; DTF, days to flowering; NL1T, number of leaves under the first truss. See Table 1 for details.

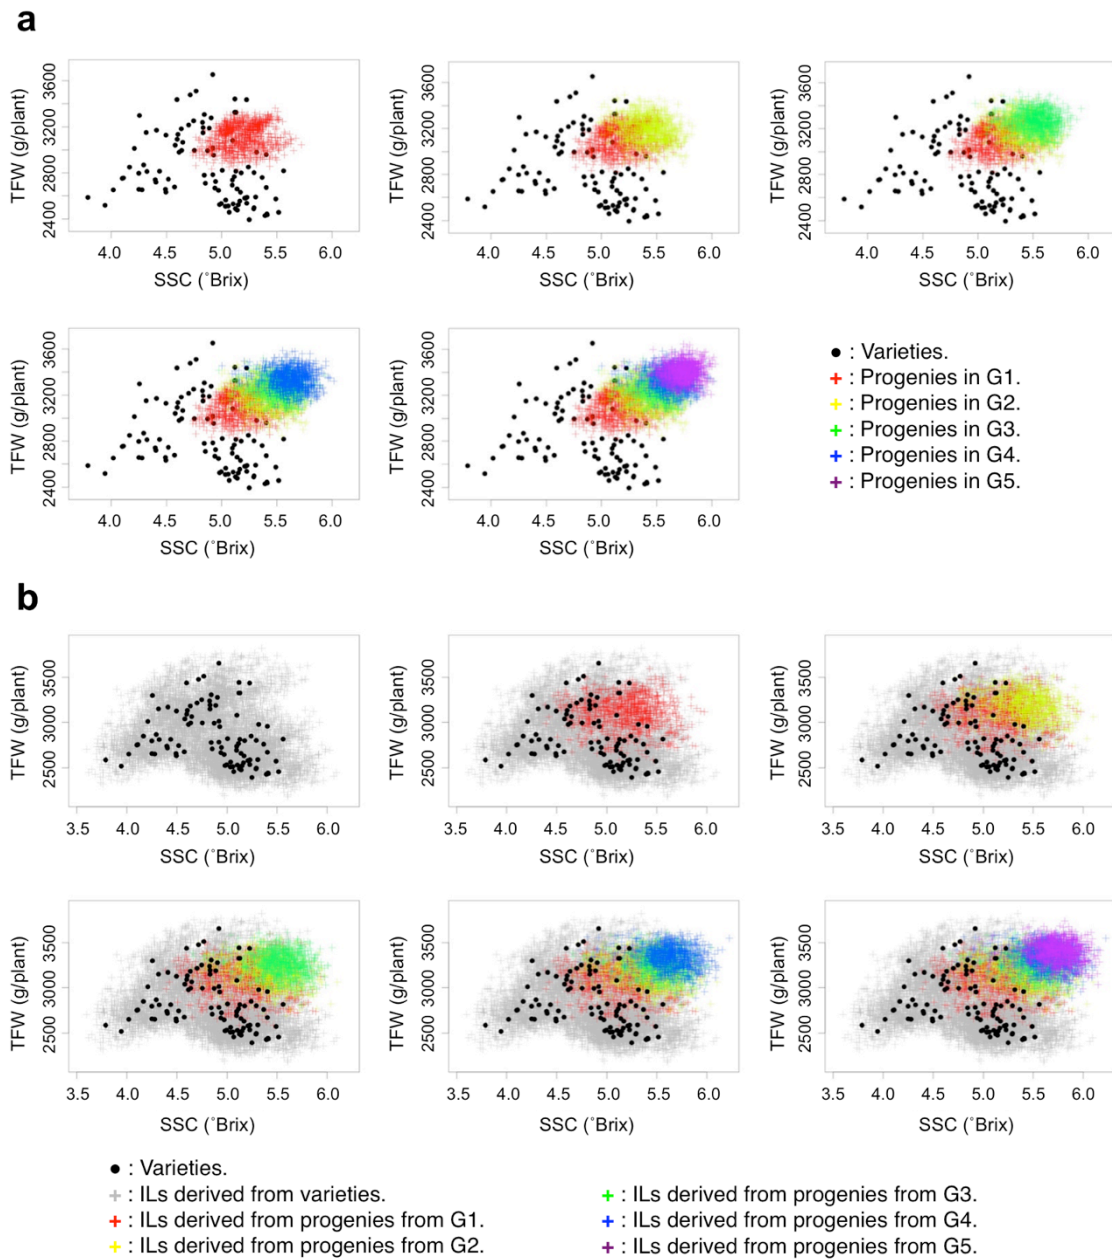

**Supplementary Figure S2** Changes in the genomic estimated breeding values (GEBVs) in the simulations of the recurrent genomic selection, specifically, distributions of the GEBVs of total fruit weight (TFW) and soluble solids content (SSC). Black circles and coloured crosses indicate the GEBVs of the 96 varieties and the simulated populations, respectively. G1 to G5 indicate the progenies derived from one to five cycles of recurrent selection for which the breeding strategy is shown in Fig. 3. (a) Distribution of GEBVs of breeding population during recurrent genomic selection. (b) Distribution of GEBVs of inbred lines (ILs) derived from breeding population during recurrent genomic selection (Fig. 3b and Supplementary Fig. S2a).



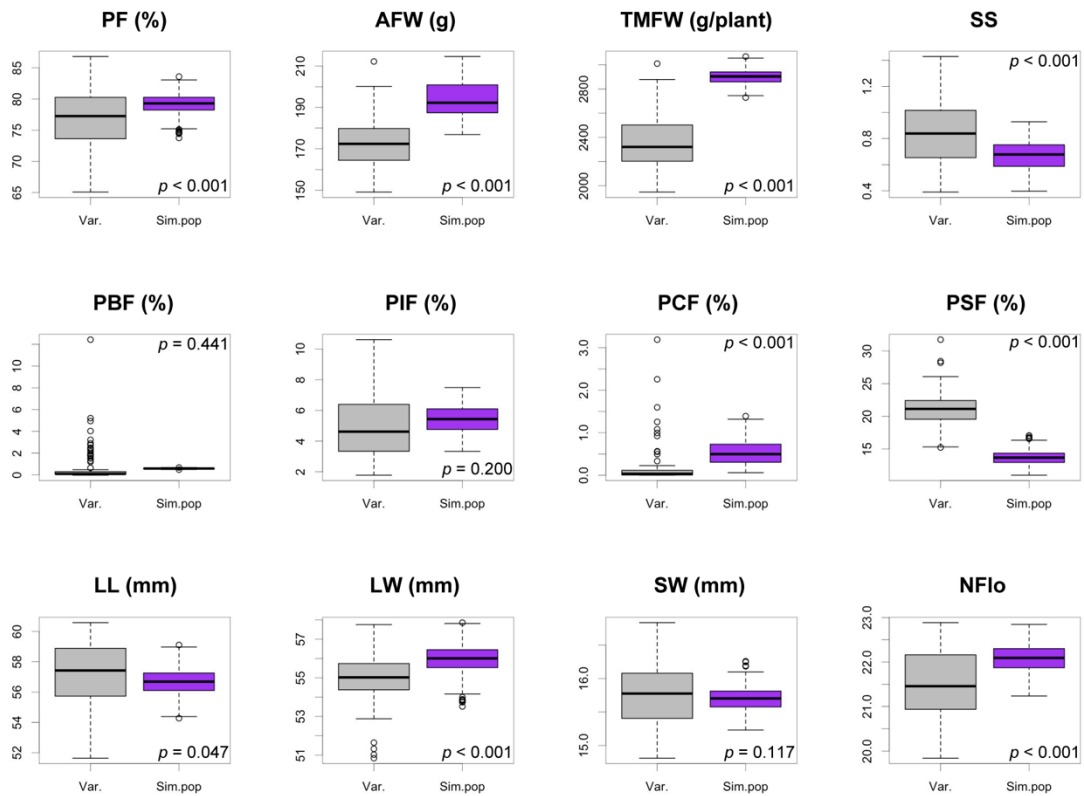

**Supplementary Figure S3** Influence of the selection for total fruit yield and soluble solids content on other traits. Boxplots for the genomic estimated breeding values in the fifth generation of the simulated population (G5 in Fig. 3b and Supplementary Fig. S2a). ‘Var.’ and ‘Sim.pop.’ at the bottom of each panel indicate the 96 varieties and the simulated population, respectively. Statistical analysis was performed using Welch’s *t*-test. PF, percentage of fruit set; AFW, average fruit weight; TMFW, total marketable fruit weight; SS, style scar; PBF, percentage of blossom-end rot fruits; PIF, percentage of irregular-shaped fruits; PCF, percentage of cracked fruits; PSF, percentage of small fruits; LL, leaf length; LW, leaf width; SW, stem width; NFlo, number of flowers.

## Supplementary Methods

### Single-nucleotide polymorphism (SNP) discovery and design of a SNP genotyping array

DNA samples from the 96 tomato F<sub>1</sub> varieties were sequenced on a HiSeq2000 (Illumina, San Diego, CA, USA) lane using 100-base-pair end sequencing. A total of 173 Gb sequences were obtained, which corresponds to a 1.90× depth for the genome of each variety (DDBJ Sequence Read Archive Submission DRA003755). Obtained reads were aligned against the tomato reference genome (Tomato Genome Consortium, 2012) (release SL2.40) by using CLC Genomic Workbench version 6.5 (CLC bio, a QIAGEN Company, Aarhus, Denmark). Repetitive sequences on the tomato reference genome were excluded based on the annotation dataset ITAG2.30. A total of 11,669,818 putative SNP sites were discovered (Supplementary Table S3). The following criteria were used for the selection of SNPs:

1. The average of quality value  $Q$  was  $> 30$ .  $Q$  is defined by  $Q = -\log_{10}(P)$ , where  $P$  is the probability of an incorrect base call.
2. The number of reads that showed polymorphism against the reference genome was  $> 2$ .
3. The number of reads obtained at the putative SNP site was  $< 500$ .

Criteria 1 and 2 were used to exclude SNPs with low reliability. Criterion 3 was used to avoid the selection of repetitive genomic regions that were undefined in ITAG2.30. By using these criteria, the number of candidate SNPs was narrowed down to 4,135,810 (Supplementary Table S3). The linkage map position (cM) of these SNPs was estimated by local polynomial regression fitting by using linkage map information from Shirasawa *et al.* (2010) as the predictors. According to the estimated linkage map position, the tomato genome was divided into 1-cM blocks, and an average 35 SNPs were selected from each block. The selected SNPs were evenly distributed on the tomato genome according to their linkage map positions. These procedures were important aspects of an objective analysis of linkage disequilibrium (LD) and breeding simulation. Specifically, because the tomato genome has a large pericentromeric region (Tomato Genome Consortium, 2012), selection of SNPs on the basis of physical positions or according to random selection will result in the selection of many SNPs on centromeric regions, which will affect the interpretation of the LD analysis and make it

difficult to determine the recombination position in a simulation study.

A total of 51,912 SNPs were selected for analysis with the Axiom myDesign Genotyping Array (Affymetrix Co, Ltd., Santa Clara, CA, USA). In this genotyping assay, 35,247 SNPs were polymorphic in the varieties used in the present study. From these polymorphic SNPs, the SNPs with minor allele frequency < 0.05 and a rate of missing genotype > 0.05 were excluded. Finally, 16,782 SNPs were provided for further analysis (Fig. 1a, Supplementary Table S3).

### Regression methods

**MLM:** This method assumes the following model (Yu *et al.*, 2006):

$$y = X\beta + Zg + \varepsilon \quad (2)$$

where  $y$  is a vector of phenotypes;  $X$  is a matrix of fixed effects including the grand mean, SNPs, and other variables;  $\beta$  is a vector of fixed effects; and  $Z$  is an incidence matrix mapping each observed phenotype to one individual. The variable  $g$  models the genetic background of each line as a random effect with  $Var[g] = K\sigma^2$ .  $K$  is the kinship matrix inferred from the genotypes. The residual variance is  $Var[\varepsilon] = I\sigma^2$ . An additive kinship matrix was used as the covariance between the lines due to a polygenic effect. Six principal components (PCs) were included as fixed effects. We used function 'GWAS' in the R package *rrBLUP* (Endelman, 2011).

**RR:** This method was examined by Meuwissen *et al.* (2001), which assumes the model

$$y = 1_n\mu + \sum_i Wq_i + e \quad (3)$$

where  $1_n$  is a vector of ones;  $\mu$  is the mean;  $W$  is a matrix that contains genotypes code as 0, 1, or 2;  $q_i$  is the effect of each SNP; and  $e$  is a vector of random normal deviates with variance  $\sigma_e^2$ . The elements in  $W$  in each column  $j$  have an amount  $2p_j$  (where  $p_j$  is the minor allele frequency of marker  $j$ ) subtracted from the genotype code to achieve that the sum of coefficients in each column is zero. The SNP effects are treated as random and summed over all segments. The genetic variance explained by the SNP effects is given by  $WW'\sigma_q^2$  and the residual variance is  $I\sigma_e^2$ , and the variance-covariance matrix among observations is  $var(y) = WW'\sigma_q^2 + I\sigma_e^2$ . The variance for each SNP can be assumed equal. Habier *et al.* (2007) showed that RR is equivalent to Genomic best linear unbiased prediction (gBLUP). In gBLUP, the model is given by

$$y = 1_n\mu + \mathbf{Z}g + e \quad (4)$$

where  $\mathbf{Z}$  is a design matrix allocating records to genetic values and  $g$  is a vector of the additive genetic effects of markers. The variance of  $g$  is  $\mathbf{G}\sigma_g^2$  where  $\mathbf{G}$  is the genomic relationship matrix and  $\sigma_g^2$  is the genetic variance for this model. The variance of  $y$  in this model is given by  $\mathbf{ZGZ}'\sigma_g^2 + I\sigma_e^2$ . We used the R package *rrBLUP* version 4.2 (Endelman, 2011) to fit the RR-BLUP model.

**BL:** In BL, the following linear model was used (Park & Casella, 2008):

$$y_i = \sum_{p=1}^P x_{ip}\beta_p + \varepsilon_i \quad (5)$$

where  $y_i$  is a phenotypic value of individual  $i$ ,  $x_{ip}$  is a genotype of marker  $p$  of individual  $i$ ,  $\beta_p$  is a effect of marker  $p$ , and  $\varepsilon_i$  is a residual for the individual  $i$  with  $\varepsilon_i \sim N(0, \sigma_e^2)$ . In BL, each regression parameter  $\beta_p$  is assumed to be normally distributed around zero with its own variance  $\sigma_p^2$ , and the degree of shrinkage is locus-specific by the variance  $\sigma_p^2$  across loci. According to Li and Sillanpää (2012) and Onogi *et al.* (2015),  $\beta_p$  was assumed to follow

$$\beta_p \sim N\left(0, 1/\tau_0^2\tau_p^2\right) \quad (6)$$

where  $\tau_p^2$  determines the magnitude of shrinkage for  $\beta_p$ , and  $1/\tau_0^2$  is the residual variance, respectively. Then,  $\tau_p^2$  was assumed to follow a prior distribution

$$\tau_p^2 \sim \text{Inv} - G\left(1, \lambda^2/2\right) \quad (7)$$

where  $\text{Inv} - G$  indicates the inverse Gamma distribution and  $\lambda^2$  is a regularisation parameter that defines the distribution of  $\tau_p^2$ . The prior distribution of  $\lambda^2$  was

$$\lambda^2 \sim G(1, \varpi) \quad (8)$$

where  $\varpi$  is the rate parameter. In BL,  $\varpi$  was the hyperparameter, and five values of  $\varpi$  were tested: 0.001, 0.01, 0.1, 1, and 5. Parameters were estimated by using variational Bayesian approaches (VBA). A nested five-fold cross-validation (CV) was performed for each cycle of LOOCV (Table 3) to determine the optimal hyperparameter value that showed the least mean square error.

**EBL:** EBL is the extension of BL that separates the regularisation parameter  $\lambda^2$  into a

shrinkage factor for the overall model sparsity and a shrinkage factor for individual markers (Mutshinda & Sillanpää, 2010). This approach is intended to assign different magnitudes of shrinkage to individual marker effects. In EBL, a prior distribution of  $\tau_p^2$  was described as follows;

$$\tau_p^2 \sim Inv - G \left( 1, \delta^2 \eta_p^2 / 2 \right) \quad (9)$$

where  $\delta^2$  is the shrinkage factor for all markers and  $\eta_p^2$  is the shrinkage factor unique to marker  $p$ . A prior distribution for  $\delta^2$  was  $\delta^2 \sim G(1, 1)$ , and for  $\eta_p^2$  was  $\eta_p^2 \sim G(1, \theta)$  where the rate parameter  $\theta$  is the hyperparameter for EBL. Six values of  $\theta$  were tested: 0.0001, 0.001, 0.01, 0.1, 1, and 5. As was the case for BL, parameters were estimated by using VBA (Mutshinda & Sillanpää, 2010) and a nested five-fold CV was performed to determine the optimal hyperparameter.

**wBSR:** A linear model for wBSR is

$$y_i = \sum_{p=1}^P \gamma_p x_{ip} \beta_p + \varepsilon_i \quad (10)$$

where  $\gamma_p$  is the indicator variable that determines whether the marker effect is included in the regression model ( $\gamma_p = 1$ ) or not ( $\gamma_p = 0$ ) (Hayashi & Iwata, 2010). A prior distribution was

$$\gamma_p \sim Bernoulli(\pi) \quad (11)$$

If  $\gamma_p = 1$ ,  $\beta_p$  was assumed to follow

$$\beta_p \sim N(0, \sigma_p^2) \quad (12)$$

then the prior for  $\sigma_p^2$  was

$$\sigma_p^2 \sim \chi^{-2}(v, S) \quad (13)$$

where  $\chi^{-2}$  indicates a scaled inverse chi-square distribution,  $v$  is a degree-of-freedom, and  $S$  is a scale parameter. In this study, we used 1 for  $v$  and  $S$ , thus  $\pi$  was the only hyperparameter adjusted. Five values of  $\pi$  were tested: 0.01, 0.1, 0.2, 0.5, and 1. Parameters were estimated by using VBA (Hayashi & Iwata, 2013) and a nested five-fold CV was performed to determine the optimal hyperparameter.

**Bayes C:** In Bayes C, the general statistical model is the same as in BL and EBL, whereas the mechanism for the shrinkage of marker effects is similar to that of wBSR

(Habier *et al.*, 2011). The prior expression for  $\beta_p$  in Bayes C was described as follows;

$$\beta_p = \begin{cases} 0 & \text{if } \rho_p = 0 \\ \sim N(0, \sigma^2) & \text{if } \rho_p = 1 \end{cases} \quad (14)$$

where  $\rho_p$  is the indicator variable that determines whether the marker effect is included in the regression model ( $\rho_p = 1$ ) or not ( $\rho_p = 0$ ), with the prior distribution

$$\rho_p = \text{Bernoulli}(\pi) \quad (15)$$

In BL, EBL, and wBSR, each SNP has its own variance, whereas all SNP effects have a common variance  $\sigma^2$  in Bayes C. A prior distribution of  $\sigma^2$  was described as follows:

$$\sigma^2 \sim \chi^{-2}(v, S) \quad (16)$$

The sets of hyperparameters tested were the same as in wBSR. VBA (Carbonetto & Stephens, 2012) was used for the parameter estimations and a nested five-fold CV was performed to determine the optimal hyperparameter.

**RKHS:** In linear regressions, phenotypes relate to marker genotype linearly. However, non-additive genetic effects, such as dominance and epistatic effects, render the relations non-linear. Kernel functions are often used to capture this non-additive relationship. The relationship model can be written as

$$K_{ij} = \langle G_i, G_j \rangle \quad (17)$$

where the angle brackets denote the inner (or dot) product between genotype  $i$  and  $j$ . In RKHS, the following kernel was used:

$$K_{ij} = \exp \left[ - (D_{ij} / \theta)^2 \right] \quad (18)$$

where

$$D_{ij} = \left[ (1/4M) \sum_{k=1}^M (G_{ik} - G_{jk})^2 \right]^{1/2} \quad (19)$$

is the Euclidean distance between marker genotypes  $i$  and  $j$ , normalised to interval  $[0, 1]$ .  $M$  is the number of markers and the parameter  $\theta$  is a scale parameter that influences how quickly the genetic covariance decays with distance. RKHS is equivalent to replacing the genomic relationship matrix  $\mathbf{G}$  with the Gaussian kernel matrix  $\mathbf{K}$  where each element is based on  $K_{ij}$ . RKHS is described by Gianola *et al.* (2006), Gianola and van Kaam (2008), and de los Campos *et al.* (2009). RKHS was performed using the R package *rrBLUP* version 4.2 (Endelman, 2011) with the default setting.

**RF:** RF is an ensemble learning method that uses a combination of decision trees, each generated from a subset of variables (markers in genomic prediction) selected by bootstrap (Breiman, 2001). RF avoids over-fitting by using stochastic perturbation (bootstrap) and averaging the outputs of the decision trees (Hastie *et al.*, 2009). RF was performed using the R package *randomForest* versions 4.6-7. All parameters were set to their default values, that is, the number of variables tried at each split  $m_{try} = p/3$ , number of trees = 500, and minimum node size = 5.

## Supplementary Note

### Validity assessment of use of averaged phenotypic values over a range of years

The phenotypic values of agronomic traits are often subject to genotype by environment (G×E) effects, which often disturb genetic analyses such as a genome-wide association study (GWAS) or whole-genome prediction (WGP) model. In the present study, we used phenotypic values averaged over four years for GWAS (Fig. 2) and WGP (Table 3), which enabled us to ignore G×E effects. We chose this approach for two reasons: (i) because only one plant was grown for each variety, each year, it is difficult to analyse G×E effects using standard statistical methods, and (ii) under such conditions, the use of averaged values is the most conservative method. However, a validity assessment for the use of the averaged phenotypic value is needed in order to estimate the reliability of the result.

We performed the following analysis to estimate the G×E effects in the present study. The analysis was composed of four experiments (Supplementary Fig. S4). In each experiment, the phenotypic values from four years were divided into two groups: phenotypic values from one year as test data and phenotypic values from the other three years as training data. The phenotypic values from three years were averaged and used for construction of a WGP model. Then the genomic estimated breeding values (GEBVs) based on the WGP model were compared with the phenotypic values from the test data. GEBVs of each trait were calculated using the statistical method that showed the highest predictability in Table 3 of the main text. The accuracy of each WGP model for the test data was evaluated as a Pearson's correlation coefficient between the phenotypic values and the GEBVs (Supplementary Fig. S4). Strong G×E effects would be revealed by the presence of low correlation coefficients.

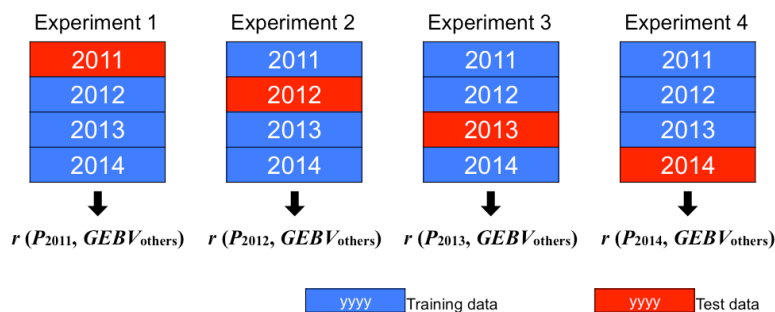

**Supplementary Figure S4** Schematic representation of the analysis to assess the validity of using averaged phenotypic values over the years.



Most of the traits showed similar correlation coefficients across the four experiments (Supplementary Table S4). In particular, total fruit weight and soluble solids content, traits that were an important focus of the main text, showed high correlation coefficients for all experiments (Supplementary Table S4). This finding indicates that the G×E effect is small for these traits in the present study.

Regarding traits categorized as 'physiological disorder of fruit', such as percentage of blossom-end rot fruits, percentage of cracked fruits, and percentage of small fruits (Table 1), several experiments showed extremely low correlation coefficients (Supplementary Table S4). Because the trait physiological disorder of fruit is easily subjected to changes in environmental conditions compared with other traits, this result is reasonable. However, in the experiments that showed extremely low correlation coefficients, the frequency of occurrence of physiological disorder was extremely low in the test data. In other words, plant growth was stable and did not differ between years. Therefore, we concluded that the G×E effect in the present study was not strong and that it is reasonable to use the averaged phenotypic values over the years for GWAS and WGP.

**Supplementary Table S4 Validity assessment of use of averaged phenotypic values over the years**

| Trait                                  | Experiment 1 | Experiment 2 | Experiment 3     | Experiment 4 |
|----------------------------------------|--------------|--------------|------------------|--------------|
| Percentage of fruit set                | 0.372        | 0.325        | 0.048            | 0.119        |
| Total fruit weight                     | 0.593        | 0.535        | 0.553            | 0.570        |
| Average fruit weight                   | 0.407        | 0.568        | 0.543            | 0.532        |
| Percentage of marketable fruits        | 0.013        | 0.461        | 0.284            | 0.323        |
| Total marketable fruit weight          | 0.403        | 0.474        | 0.390            | 0.505        |
| Average marketable fruit weight        | 0.409        | 0.561        | 0.576            | 0.445        |
| Soluble solids content                 | 0.632        | 0.663        | 0.787            | 0.705        |
| Style scar                             | 0.453        | 0.439        | 0.526            | 0.432        |
| Percentage of blossom-end rot fruits   | 0.444        | -0.003       | 0.317            | NA           |
| Percentage of irregular-shaped fruits  | 0.517        | 0.402        | 0.389            | 0.383        |
| Percentage of cracked fruits           | 0.202        | -0.034       | NA <sup>*1</sup> | NA           |
| Percentage of small fruits             | -0.103       | 0.363        | 0.278            | 0.297        |
| Leaf length                            | 0.297        | 0.552        | 0.322            | NA           |
| Leaf width                             | 0.419        | 0.200        | 0.347            | NA           |
| Stem width                             | 0.286        | 0.221        | 0.438            | NA           |
| Height to the first truss              | 0.481        | 0.583        | 0.404            | NA           |
| Number of flowers                      | 0.304        | 0.187        | 0.444            | 0.325        |
| Days to flowering                      | 0.289        | 0.272        | NA               | 0.447        |
| Number of leaves under the first truss | 0.139        | 0.354        | 0.187            | NA           |

Values are Pearson's correlation coefficients between phenotypic values from a year and genomic estimated breeding values (GEBVs) based on the other three years (Supplementary Fig. S4).

NA, not analysed because phenotypic record for that year was not available.

<sup>\*1</sup> Correlation coefficient of percentage of cracked fruits in experiment 3 was incalculable because a very small number of varieties showed a non-zero phenotype.

## References

- Breiman, L. Random forests. *Machine Learning* **45**, 5-32 (2001).
- Carbonetto, P. & Stephens, M. Scalable variational inference for Bayesian variable selection in regression, and its accuracy in genetic association studies. *Bayesian Analysis* **7**, 73-108 (2012).
- de Los Campos, G., Gianola, D. & Rosa, G.J.M. Reproducing kernel Hilbert spaces regression: a general framework for genetic evaluation. *J. Anim. Sci.* **87**, 188 (2009).
- Endelman, J.B. Ridge regression and other kernels for genomic selection with R package rrBLUP. *Plant Genome* **4**, 250-255 (2011).
- Gianola, D., Fernando, R.L., & Stella, A. Genomic-assisted prediction of genetic value with semiparametric procedures. *Genetics* **173**, 1761-1776 (2006).
- Gianola, D. & van Kaam, J.B. Reproducing kernel Hilbert spaces regression methods for genomic assisted prediction of quantitative traits. *Genetics* **178**, 2289-2303 (2008).
- Habier, D., Fernando, R.L. & Dekkers, J.C. The impact of genetic relationship information on genome-assisted breeding values. *Genetics* **177**, 2389-2397 (2007)
- Habier, D., Fernando, R.L., Kizilkaya, K. & Garrick, D.J. Extension of the bayesian alphabet for genomic selection. *BMC Bioinformatics* **12**, 186 (2011).
- Hastie, T., Tibshirani, R. & Friedman, J. The elements of statistical learning. *Springer, New York* (2009).
- Hayashi, T. & Iwata, H. EM algorithm for Bayesian estimates of genomic breeding values. *BMC Genetics* **11**, 3 (2010).
- Hayashi, T. & Iwata, H. A Bayesian method and its variational approximation for prediction of genomic breeding values in multiple traits. *BMC Bioinformatics* **14**, 31 (2013).
- Li, Z. & Sillanpää, M.J. Estimation of quantitative trait locus effects with epistasis by variational Bayes algorithms. *Genetics* **190**, 231-249 (2012).
- Meuwissen, T.H.E., Hayes, B.J. & Goddard, M.E. Prediction of total genetic value using genome-wide dense marker maps. *Genetics* **157**, 1819-1829 (2001).
- Mutshinda, C.M. & Sillanpää, M.J. Extended Bayesian LASSO for multiple quantitative trait loci mapping and unobserved phenotype prediction. *Genetics* **186**, 1067-1075 (2010).

- Onogi, A. *et al.* Exploring the areas of applicability of whole-genome prediction methods for Asian rice (*Oryza sativa* L.). *Theor. Appl. Genet.* **128**, 41-53 (2015).
- Park, T. & Casella, G. The Bayesian LASSO. *J. Am. Stat. Assoc.* **103**, 681-686 (2008).
- Shirasawa, K. *et al.* An interspecific linkage map of SSR and intronic polymorphism markers in tomato. *Theor. Appl. Genet.* **121**, 731–739 (2010).
- Tomato Genome Consortium. The tomato genome sequence provides insights into fleshy fruit evolution. *Nature* **485**, 635–641 (2012).
- Yu *et al.* A unified mixed-model method for association mapping that accounts for multiple levels of relatedness. *Nat Genet* **38**, 203-208 (2006).
